# Supplementary material
Source: MDPI journal article supplement (https://www.mdpi.com/2813-2475/2/3/20)
Supplement: s1 [file s1]

Archive with 2 entries (2 files):
- 09 Supplementary figure S11 - Subgroup Analysis of Significant Predictors pf ISR.pdf
- 20230614 08 Supplementary materials (Supplementary Figures S1-S10 and Supplementary Tables S1-S3).pdf
