# Supplementary material
Source: MDPI journal article supplement (https://www.mdpi.com/2813-2475/2/3/20)
Supplement: s1 [file s1]

## Subgroup Analysis of Significant Predictors pf ISR

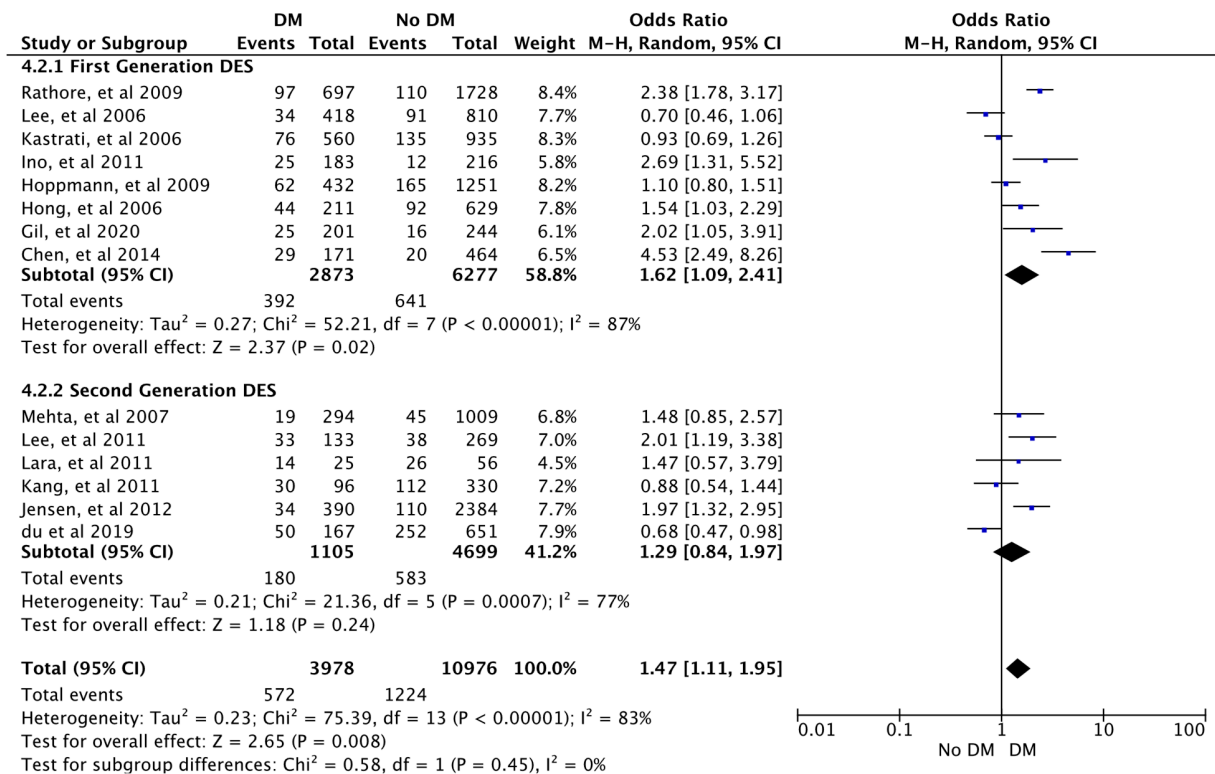

Figure S12. Subgroup Analysis of DM on ISR

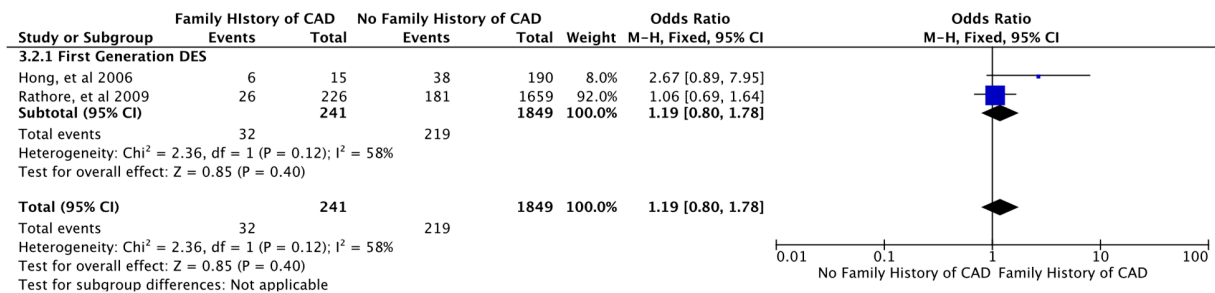

Figure S13. Subgroup Analysis of history of CAD on ISR

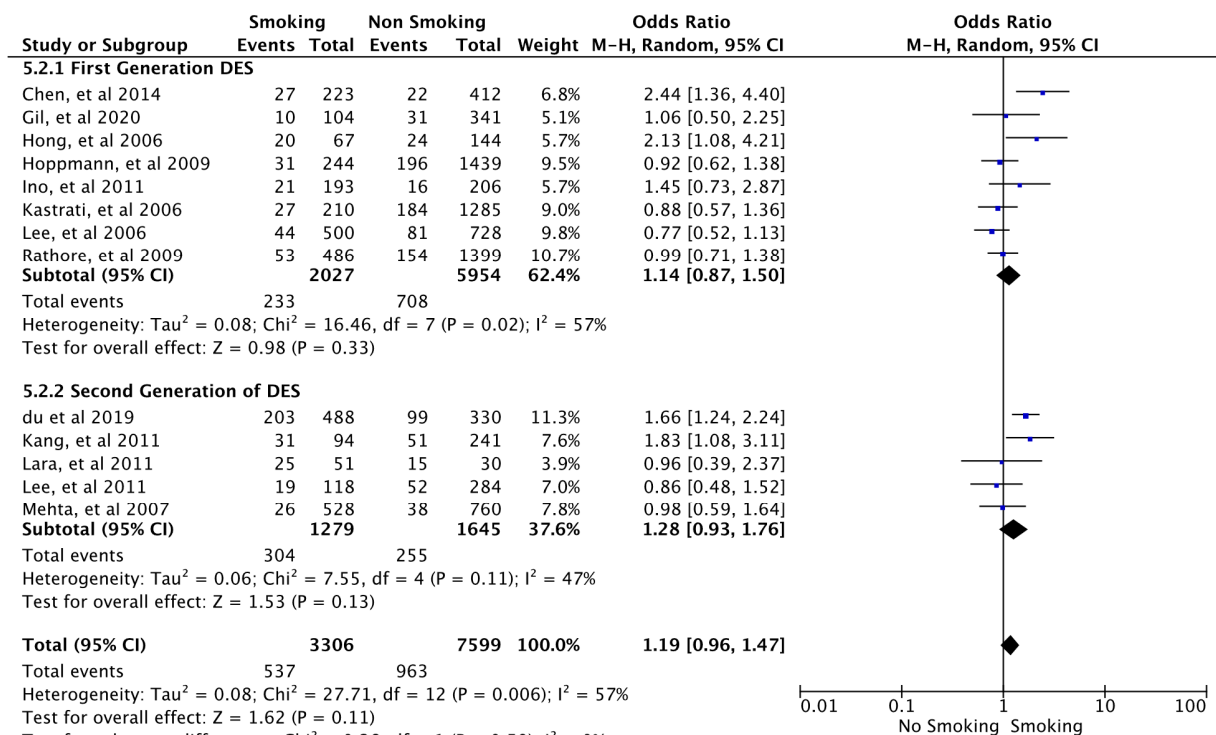

Figure S14. Subgroup Analysis of Smoking on ISR

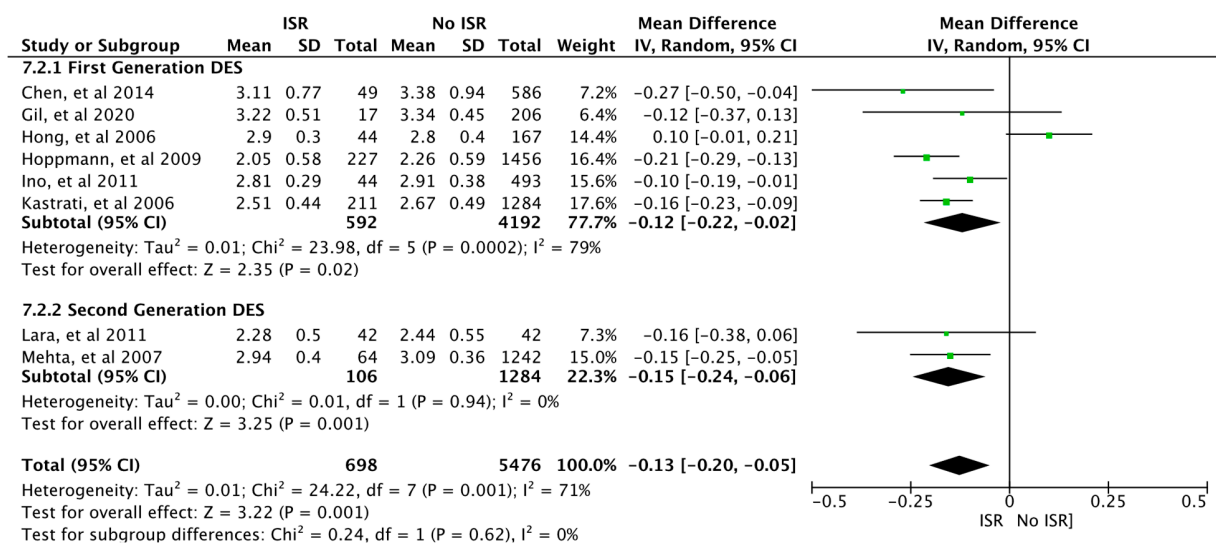

Figure S15. Subgroup analysis of stent diameter on ISR

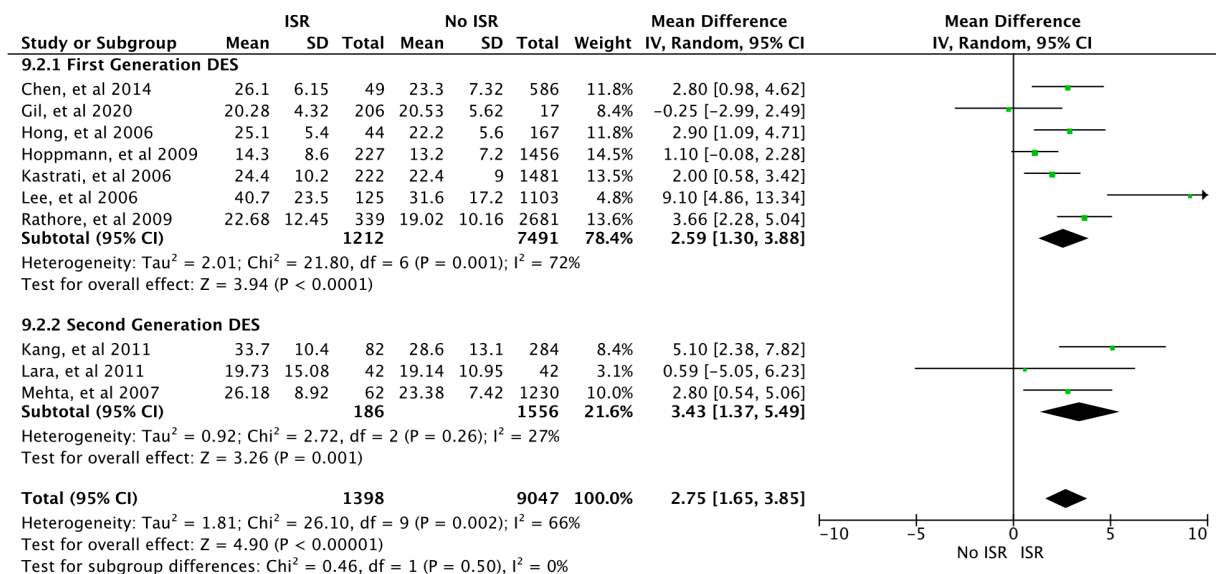

Figure S16. Subgroup analysis of stent length on ISR

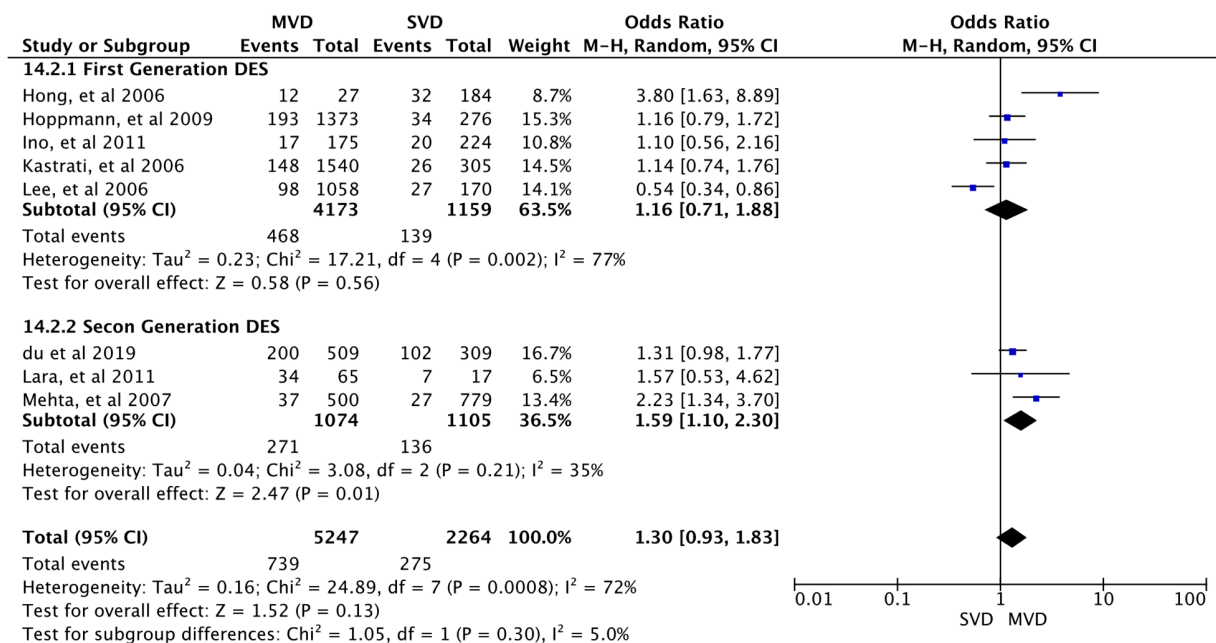

Figure S17. Subgroup analysis of multivessel diseases on ISR

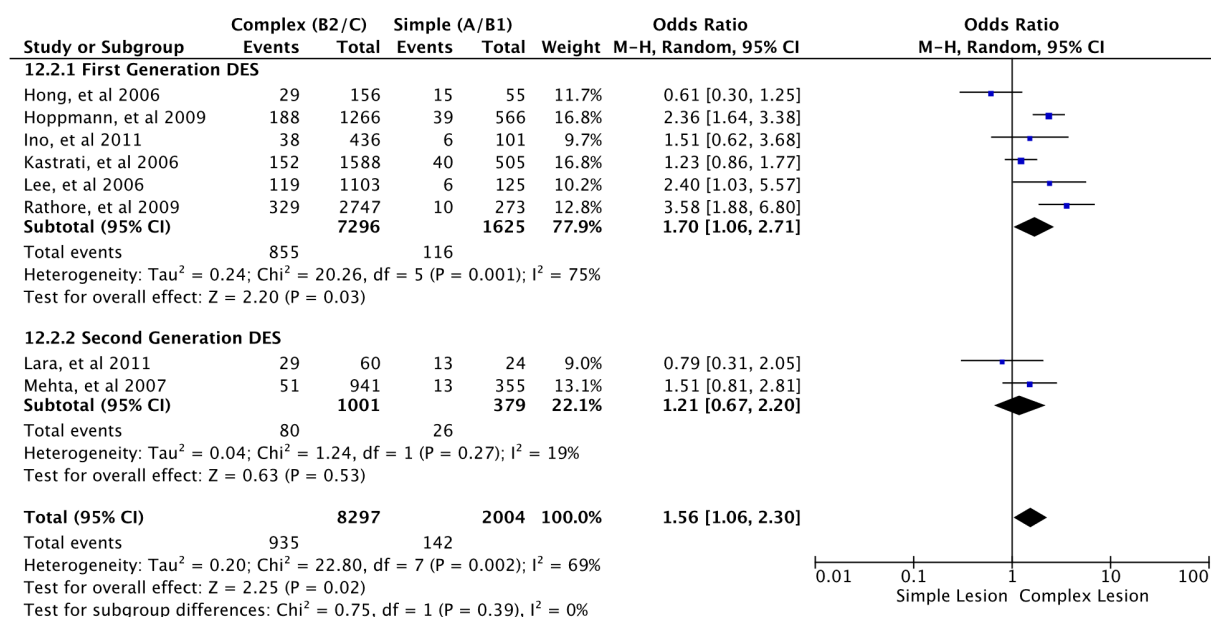

Figure S18. Subgroup analysis of complexity of lesion on ISR
